# Supplementary material for: Patterning of interconnected human brain spheroids
Source: Royal Society of Chemistry journal article supplement (doi:10.1039/d0lc01112f), 2021-01-01
Supplement: d0lc01112f1.pdf [file d0lc01112f1.pdf]

## Supplementary Information

### Patterning of interconnected human brain spheroids

Jae Jung Kim<sup>1,2,4†</sup>, Mehdi Jorfi<sup>1,3†</sup>, Rudolph E. Tanzi<sup>3</sup>, Doo Yeon Kim<sup>3</sup>, Patrick S. Doyle<sup>2</sup>,  
and Daniel Irimia<sup>1,4</sup>

<sup>1</sup>Center for Engineering in Medicine, Department of Surgery, Massachusetts General Hospital, Harvard Medical School, Charlestown, Massachusetts, United States.

<sup>2</sup>Department of Chemical Engineering, Massachusetts Institute of Technology, Cambridge, Massachusetts, United States.

<sup>3</sup>Genetics and Aging Research Unit, McCance Center for Brain Health, MassGeneral Institute for Neurodegenerative Disease, Department of Neurology, Massachusetts General Hospital, Harvard Medical School, Charlestown, Massachusetts, United States.

<sup>4</sup>Shriners Hospital for Children, Boston, Massachusetts, United States.

†These authors contributed equally: Mehdi Jorfi and Jae Jung Kim.

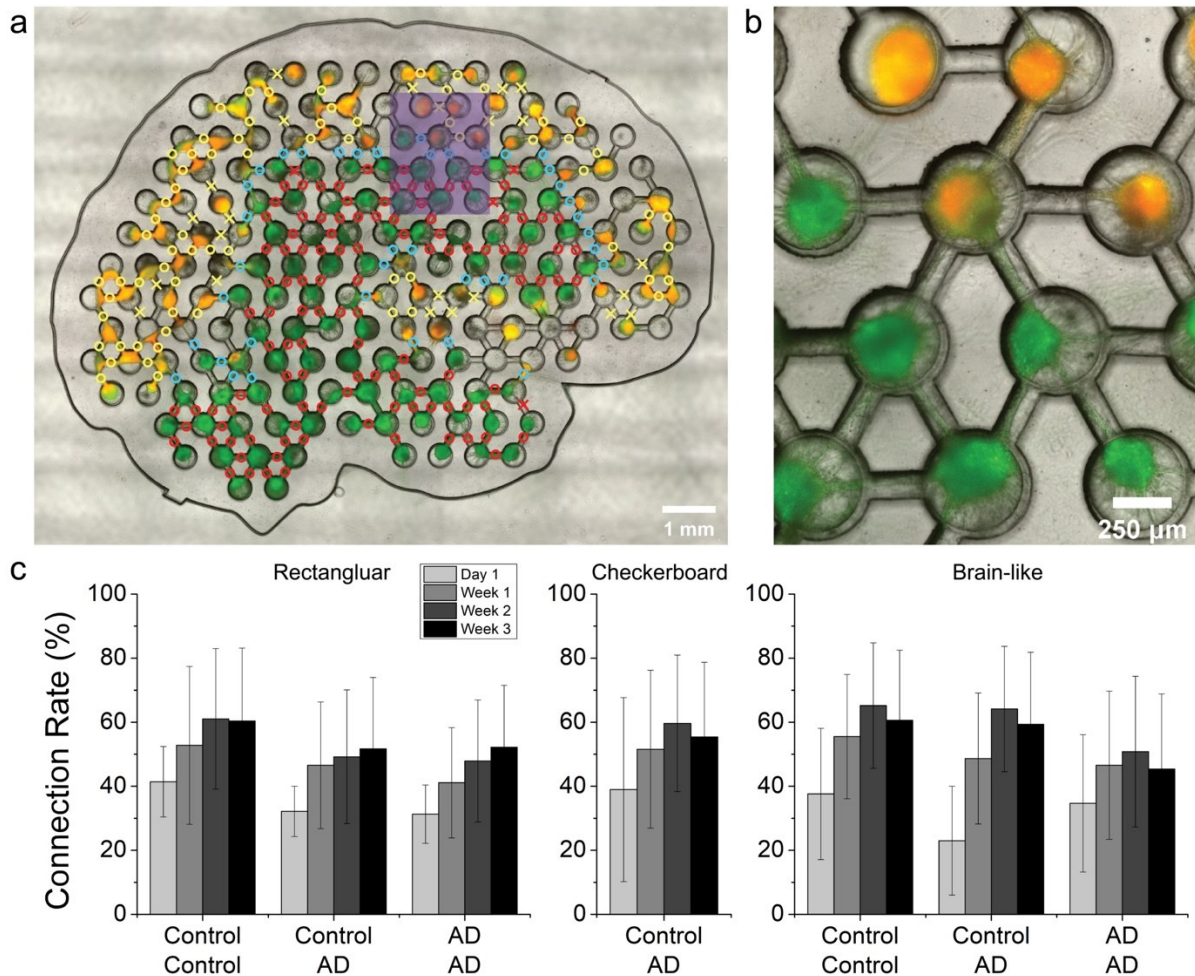

**Supplementary Fig. 1** The connection between adjacent brain spheroids. (a) The merged channel image of a brain-shaped pattern at 3-week-differentiation. Adjacent wells are connected through channels at the bottom of the wells. Neurite connections between two adjacent brain spheroids are marked by OX symbols: O = connection, X = no connection. The symbol color represents the type of spheroid pairs: red = control-control, blue = control-AD, yellow = AD-AD. The purple shaded area is zoomed in and shown in b. (b) Representative image shows the connection between all spheroid-pair-type: control-control, control-AD, and AD-AD. (c) The graphs display the connection rates between adjacent brain spheroids of different types (means  $\pm$  SEM, N = 4 for rectangular and brain-like, or 3 for checkerboard).
